# Supplementary material for: Comparative Evaluation of Existing and Rationally Designed Novel Antimicrobial Peptides for Treatment of Skin and Soft Tissue Infections
Source: MDPI journal article supplement (doi:10.3390/antibiotics12030551), 2023-03-10
Supplement: s1 [file s1]

**Table S1.** Minimal inhibitory concentrations (MIC) of antibiotics and non-antibiotic agents against bacteria used in the study, µg /ml.

|                                       |                  | <i>E.coli</i> | <i>P. aeru-<br/>ginosa</i> | <i>K. pneumonia</i> | <i>E. faecium</i> | <i>S. aureus</i> | <i>C. acnes</i> |
|---------------------------------------|------------------|---------------|----------------------------|---------------------|-------------------|------------------|-----------------|
| Antibiotics <sup>a</sup>              | Azythromycin     | -             | -                          | 8.0                 | -                 | 0.5              | -               |
|                                       | Claritromycin    | -             | -                          | 64.0                | -                 | 0.25             | -               |
|                                       | Amoxiclav        | -             | -                          | 8.0                 | -                 | 0.13             | -               |
|                                       | Gentamicin       | 1.0           | 0.25                       | 0.25                | 1,0               | 0.25             | -               |
| Non-antibiotic<br>agents <sup>b</sup> | Benzoyl peroxide | 31.0          | -                          | -                   | -                 | 1250.0           | 80.0            |
|                                       | Chlorhexidine    | 16.0          | 1.0                        | -                   | -                 | 1.0              | 1.0             |

<sup>a</sup> Azithromycin dihydrate (Sigma-Aldrich, St. Louis, MO, USA), clarithromycin (Sigma-Aldrich, St. Louis, MO, USA), amoxiclav (Sandoz, Kundl, Austria; amoxicillin 875 mg, acid clavulanic 125 mg), gentamicin (Sigma-Aldrich, St.Louis, MO, USA). <sup>b</sup> Benzoyl peroxide (Saules Aptieka, Riga, Latvia), chlorhexidine (Saules aptieka, Riga, Latvia).
